# Supplementary material
Source: PubMed Central journal article supplement (PMC7057707)
Supplement: ao9b04155_si_001.pdf [file ao9b04155_si_001.pdf]

***Supporting Information***

**Seaweed extract improved yields, leaf photosynthesis, ripening time and net returns of tomato (*Solanum lycopersicum* Mill.)**

Yuanyuan Yao<sup>a</sup>, Xiaoqi Wang<sup>a,b</sup>, Baocheng Chen<sup>a\*</sup>, Min Zhang<sup>a,b</sup>, Jin-zhao Ma<sup>c</sup>

<sup>a</sup>National Engineering Laboratory for Efficient Utilization of Soil and Fertilizer Resources, College of Recourses and Environment, Shandong Agricultural University, Taian, 271018, China

<sup>b</sup>State Key Laboratory of Nutrition Resources Integrated Utilization, Kingenta Ecological Engineering Group Co., Ltd., Linshu, 276700, China

<sup>c</sup>Shandong Provincial Key Laboratory of Eco-Environmental Science for Yellow River Delta, Binzhou University, Binzhou 256603, China

This supporting information contains 6 pages including 3 Figures and 1 Table

## **Contents**

|                                                |    |
|------------------------------------------------|----|
| Contents.....                                  | S2 |
| RESULTS AND DISCUSSION.....                    | S3 |
| Chemical structure and composition of SES..... | S3 |
| MATERIALS AND METHODS.....                     | S4 |
| Experimental sites and materials.....          | S4 |
| Experimental design.....                       | S6 |

## RESULTS AND DISCUSSION

### Chemical structure and composition of SES

Table S1. Integration area of <sup>1</sup>H NMR spectra from SES.

| $\delta(^1\text{H})$ [ppm] | 0.5-1.9 | 1.9-3.1 | 3.1-4.9 | 5.1-6.5 | 6.5-9.5 |
|----------------------------|---------|---------|---------|---------|---------|
| SES                        | 10.63   | 7.08    | 57.87   | 9.31    | 15.11   |

## MATERIALS AND METHODS

### Experimental sites and materials

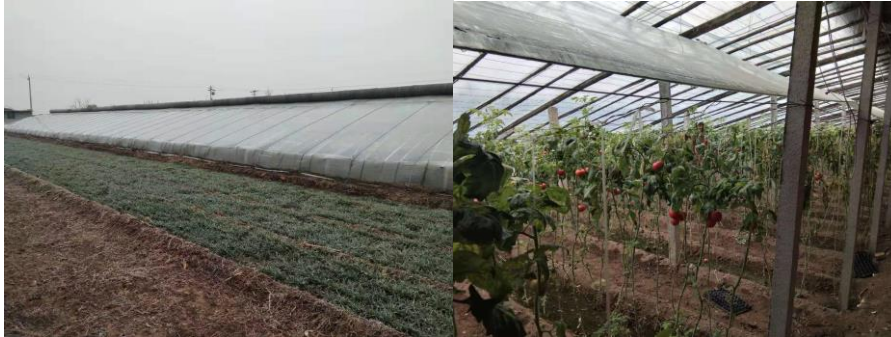

Figure S1. Photos of greenhouse and the plot

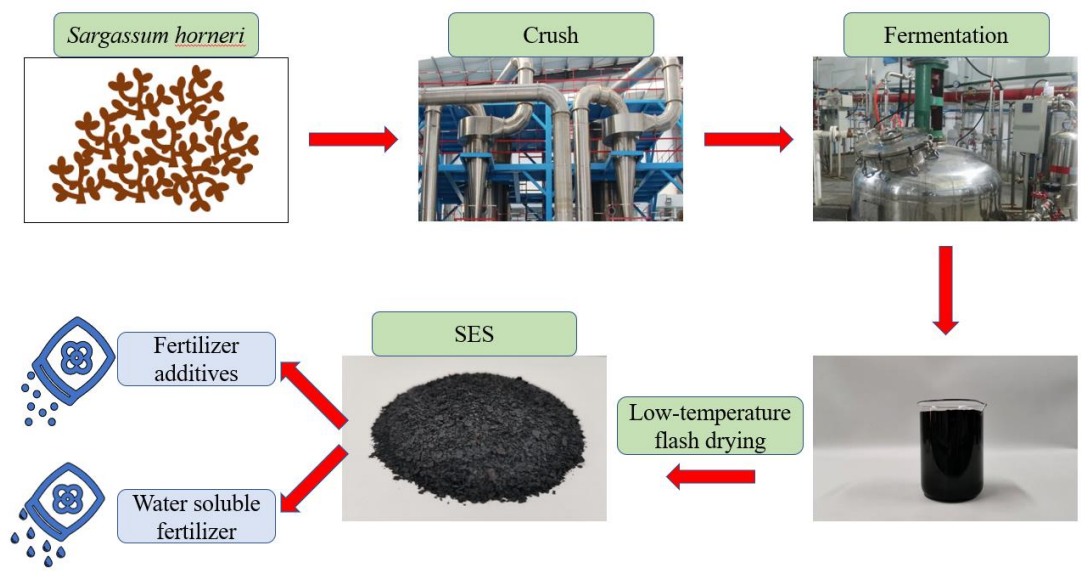

Figure S2. Production process of SES

## Experimental design

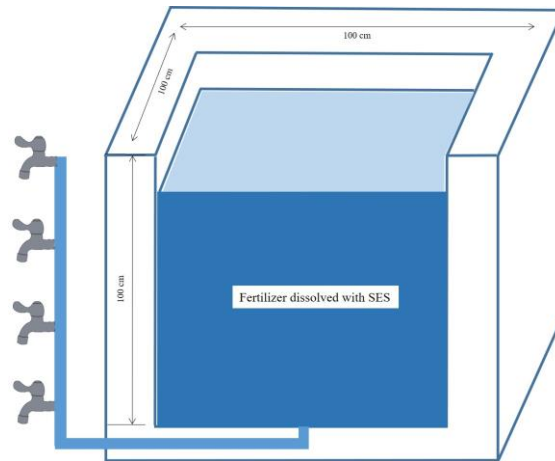

Figure S3. Schematic diagram of irrigation system
